# Supplementary material for: Towards N-rich solid polymer electrolytes for Li-ion batteries?
Source: Royal Society of Chemistry journal article supplement (doi:10.1039/d3ma00494e), 2023-01-01
Supplement: d3ma00494e1.pdf [file d3ma00494e1.pdf]

## Towards N-rich solid polymer electrolytes for Li-ion batteries?

L. Artigues,<sup>1,3</sup> M. Deschamps,<sup>2,3</sup> F. Salles,<sup>1</sup> V. Chaudoy,<sup>4</sup> V. Lapinte,<sup>1</sup> L. Monconduit,<sup>1,2\*</sup>

<sup>1</sup> ICGM, University of Montpellier, CNRS, ENSCM, Montpellier, France

<sup>2</sup> CEMHTI, CNRS UPR 3079, Université d'Orléans, F45071 Orléans, France

<sup>3</sup> Réseau sur le Stockage Electrochimique de l'Energie (RS2E), CNRS FR3459, Amiens, France

<sup>4</sup> Technocentre Renault, 1 avenue du Golf, 78084 Guyancourt, France

### Supplementary Information

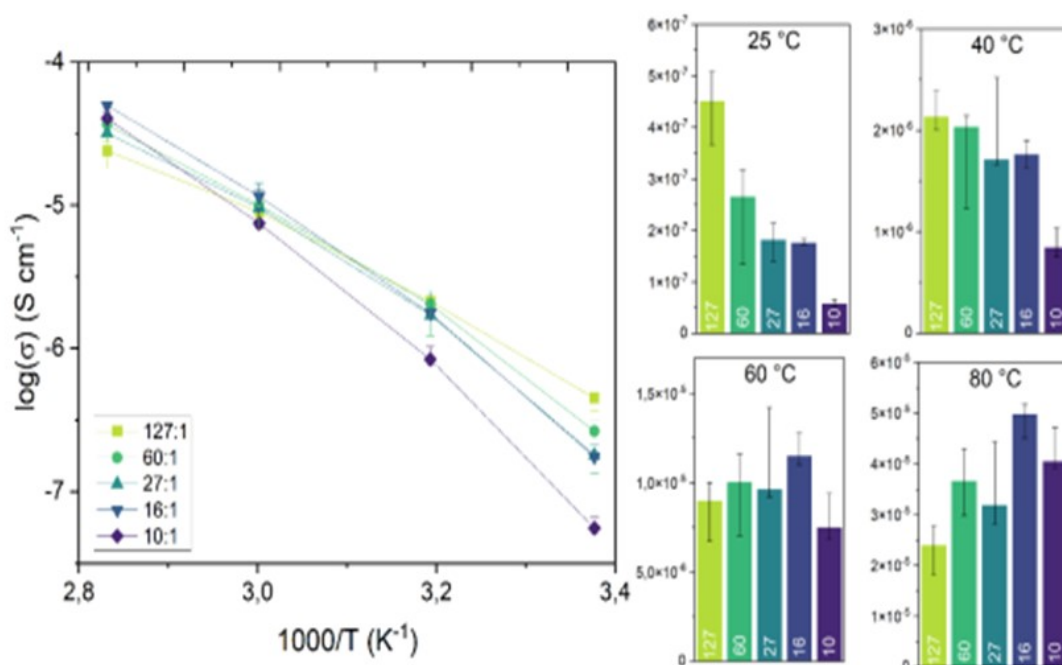

**Figure S11:** Ionic conductivity of BPEI mixed at different salt concentrations

Figure S11 shows the ionic conductivity measurements of BPEI based electrolyte for different salt concentrations and over the temperature range from 25 to 80 °C. Curves do not follow the linear Arrhenius law but rather the VTF model. The mobility of lithium ions is therefore activated by the segmental movement of the polymer chains.

Depending on the temperature, the best conductivities are not obtained with the same LiTFSI concentration. For example, at 25°C, it is the 127:1 ratio which makes it possible to reach the optimum of  $4.5 \cdot 10^{-7} \text{ S} \cdot \text{cm}^{-1}$  or at 40°C it is the ratios 127:1 and 60 :1 which make it possible to obtain a conductivity of around  $2 \cdot 10^{-6} \text{ S} \cdot \text{cm}^{-1}$ . The N:Li ratio = 60, which corresponds to a

concentration of 10% by weight presents a good compromise between the number of charged species present in the polymer and chain mobility correlated to a slightly increased Tg.

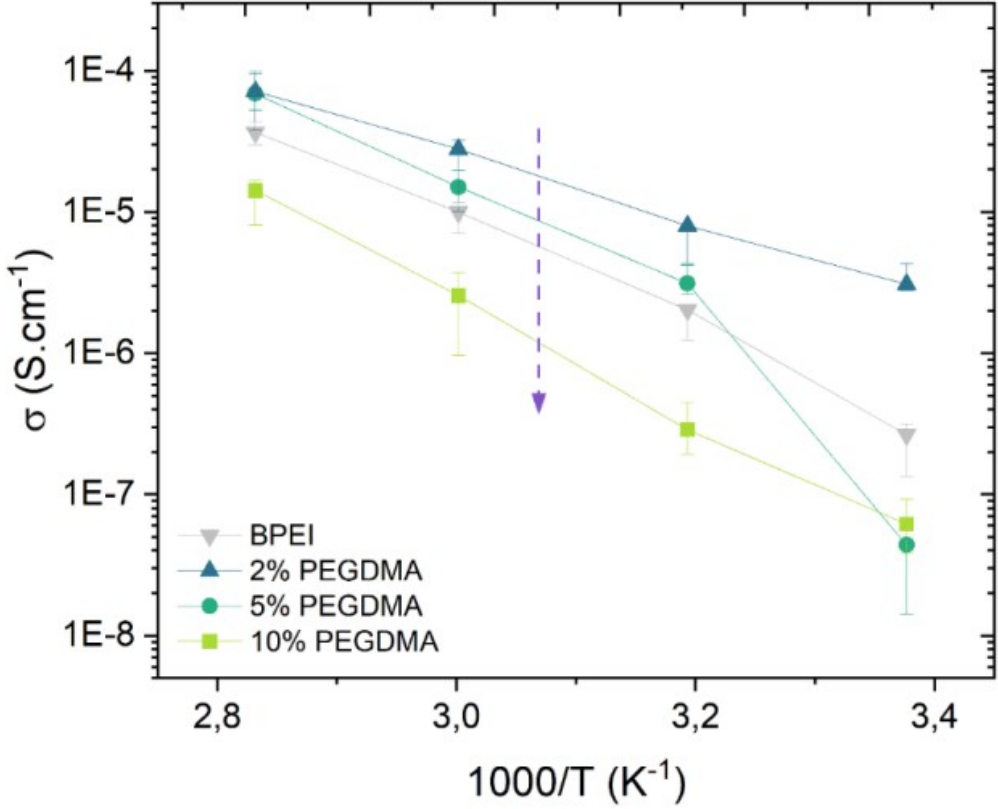

**Figure SI2:** Evolution of ionic conductivity as a function of temperature and PEGDMA content

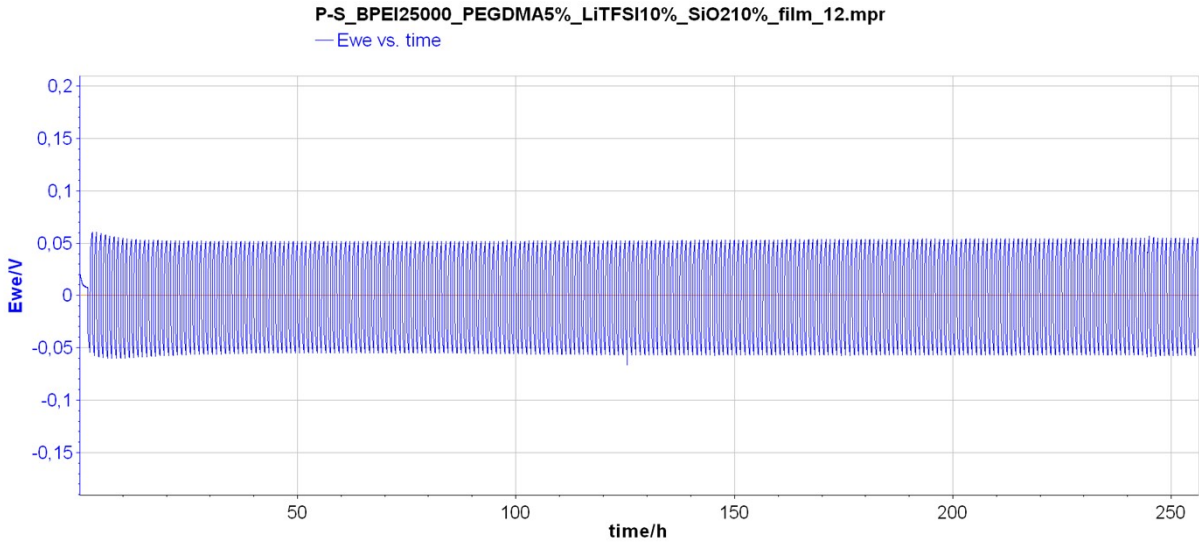

**Figure SI3:** Polarization test of SiO<sub>2</sub>-IPN
